# Supplementary material
Source: publisher figshare collection journal article supplement (https://gsapubs.figshare.com/ndownloader/files/22411938)
Supplement: Supplementary file 1 [file 22411938]

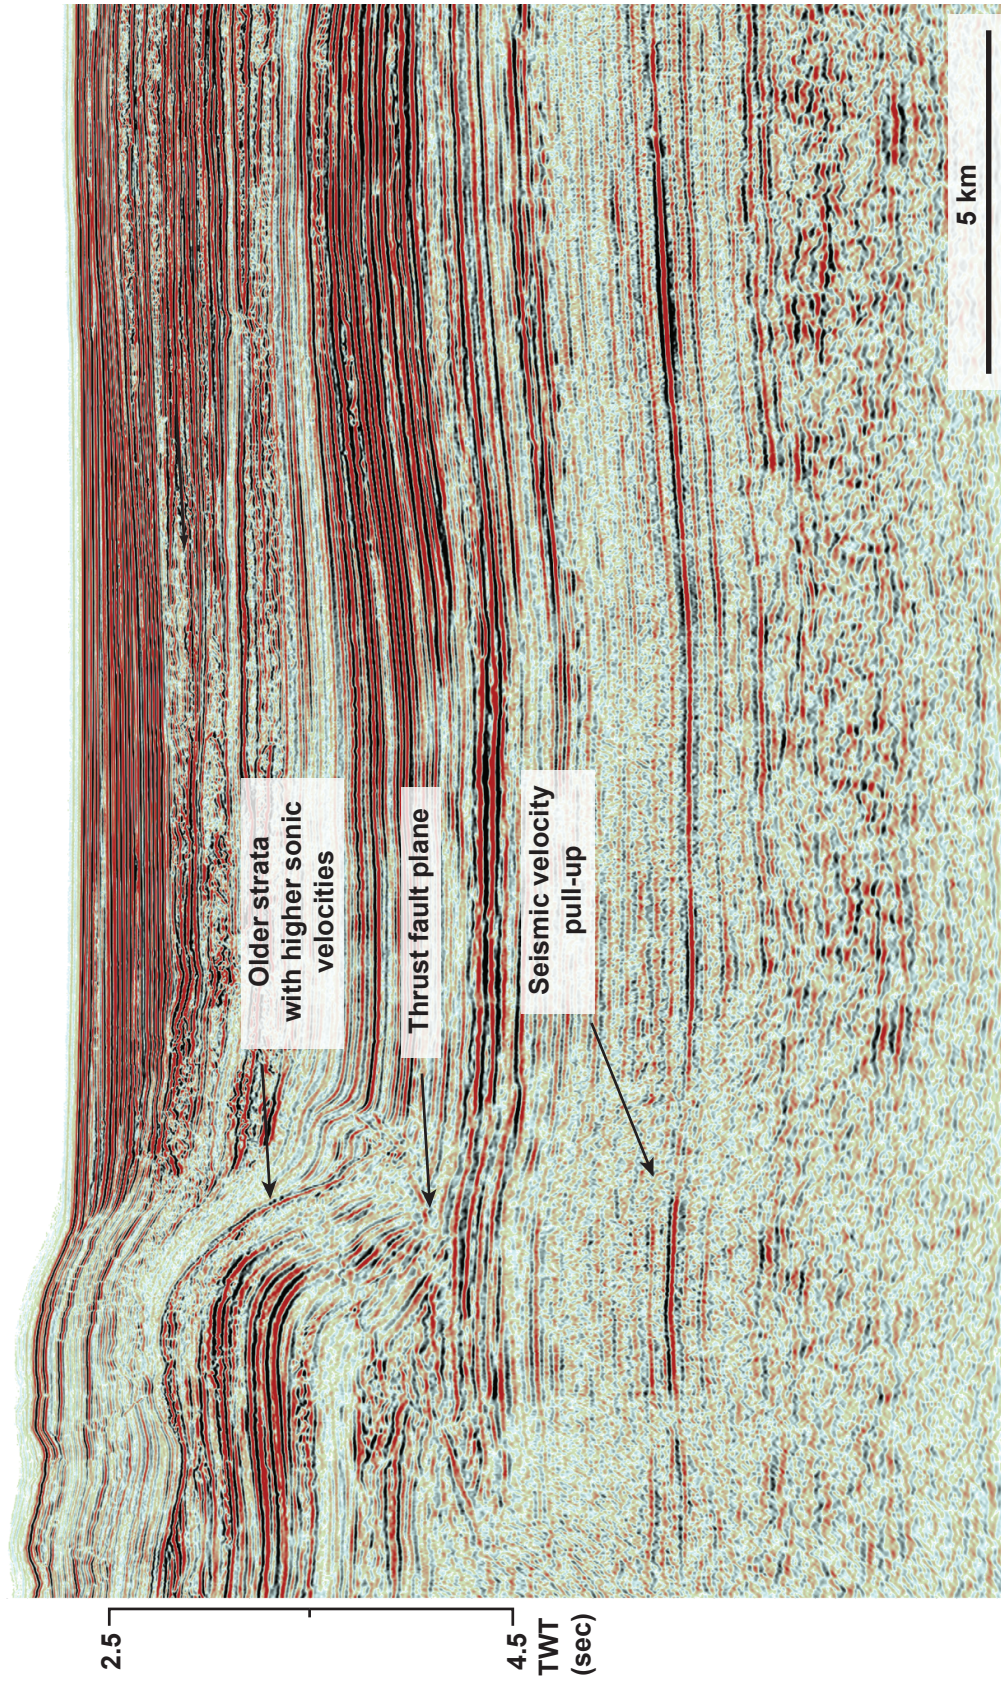

**Figure S1:** 3D seismic line L7500 from the NW Borneo 3D survey showing a seismic velocity 'pull-up' artefact caused by thrusting of older and presumably faster-velocity strata in the hangingwall above slower-velocity strata in the footwall. Seismic pull-up within the 3D survey were on the order of ~100 ms and were insufficient to fully explain the footwall synclines seen in the study area (e.g. Figs. 8c,d).
